# Supplementary material
Source: Springer Nature journal article supplement (https://www.springermedizin.de/resource/supplementary/13054_2013_2873_MOESM4_ESM.pdf/9714062)

Nosocomial Bacteremia (rate)

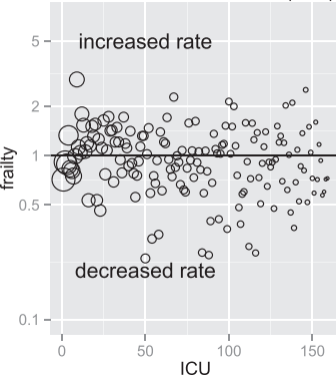

Death without NB

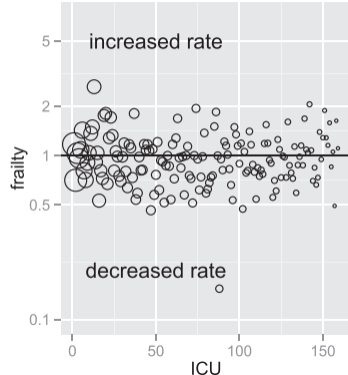

Discharge without NB

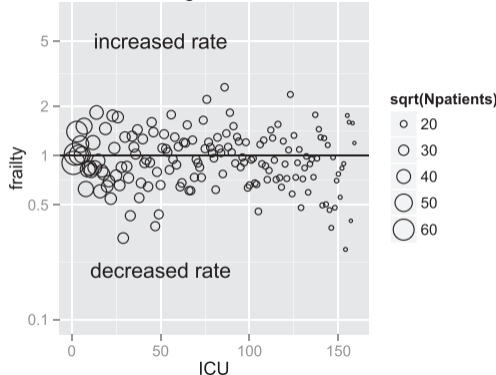

Supplement: MOESM4 [file 9714062]
